# Supplementary material
Source: Springer Nature journal article supplement (https://www.springermedizin.de/resource/supplementary/13006_2008_79_MOESM1_ESM.pdf/9627972)

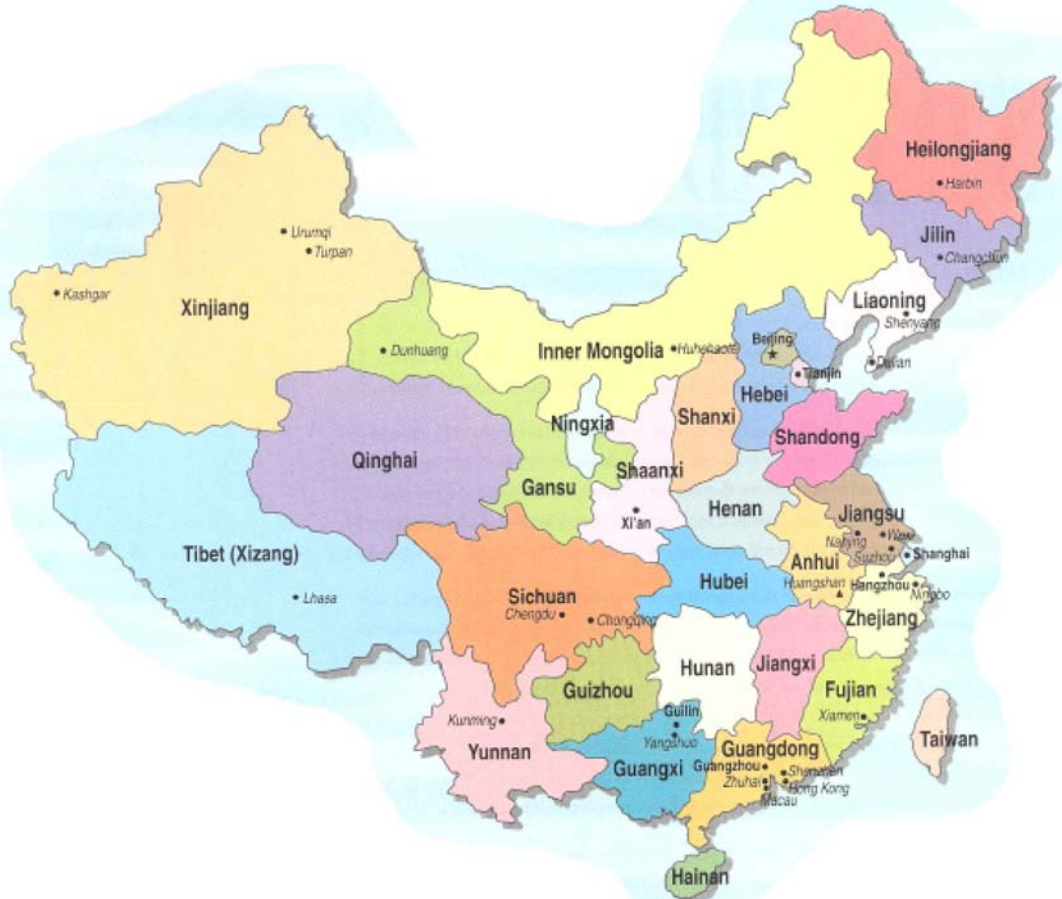

Supplement: MOESM1 [file 9627972]
